# Supplementary material for: Isolation and Characterization of a New Phage Infecting Elizabethkingia anophelis and Evaluation of Its Therapeutic Efficacy in vitro and in vivo
Source: PubMed Central journal article supplement (PMC7237756; doi:10.3389/fmicb.2020.00728), 2020-05-13
Supplement: Data_Sheet_1.pdf [file Data_Sheet_1.pdf]

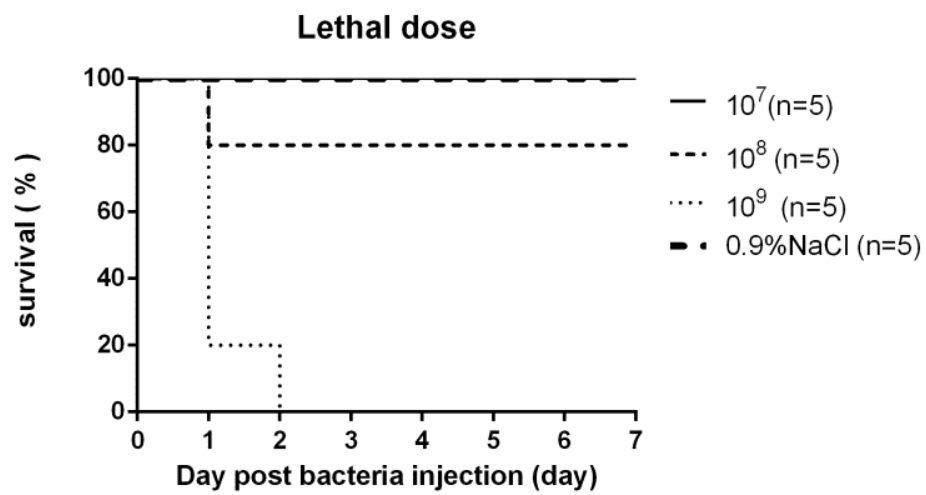

**Supplementary FIGURE 1** |The minimum lethal dose (CFU) of *E. anophelis* to the mice with sepsis induced by intraperitoneal injection.
